# Supplementary material
Source: PubMed Central journal article supplement (PMC2574794)

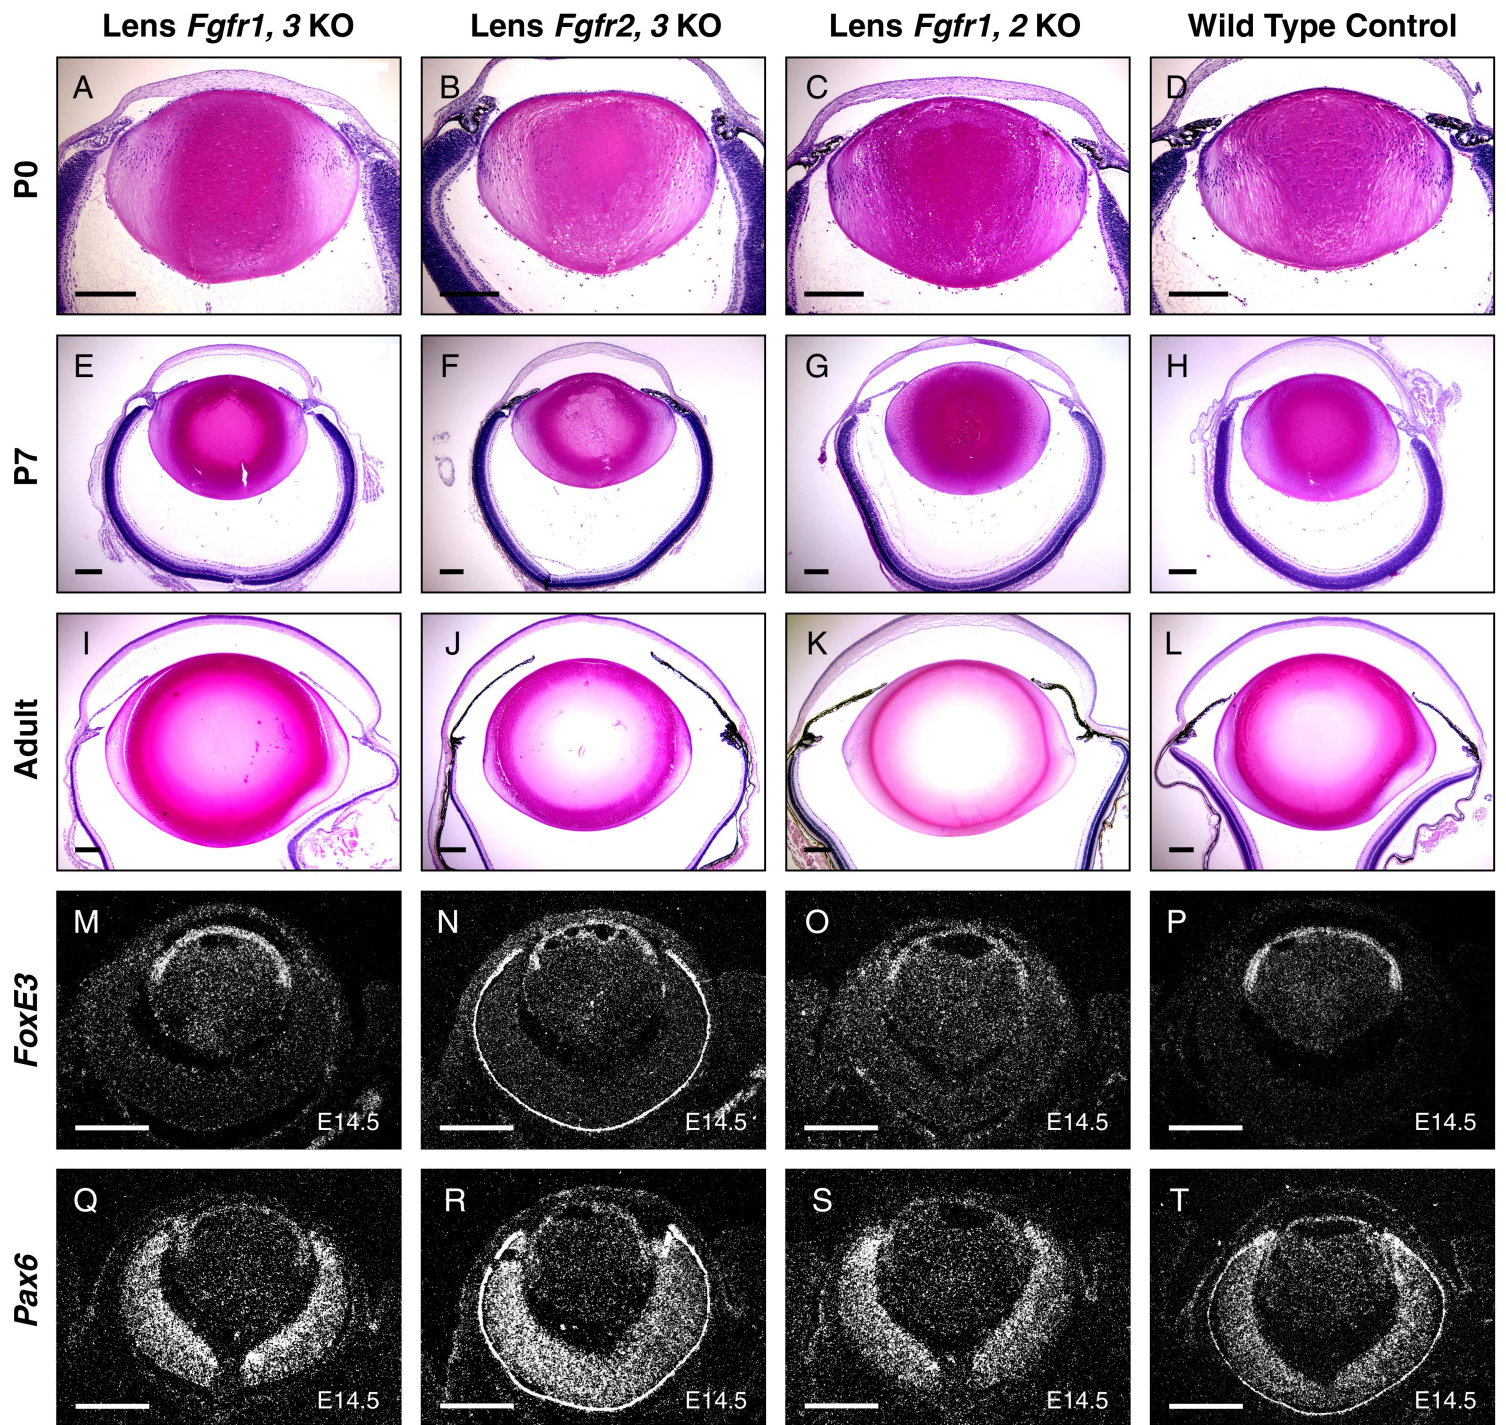

Zhao et al\_ Supplemental Figure 1

Supplement: NIHMS52425-supplement-10.pdf [file NIHMS52425-supplement-10.pdf]

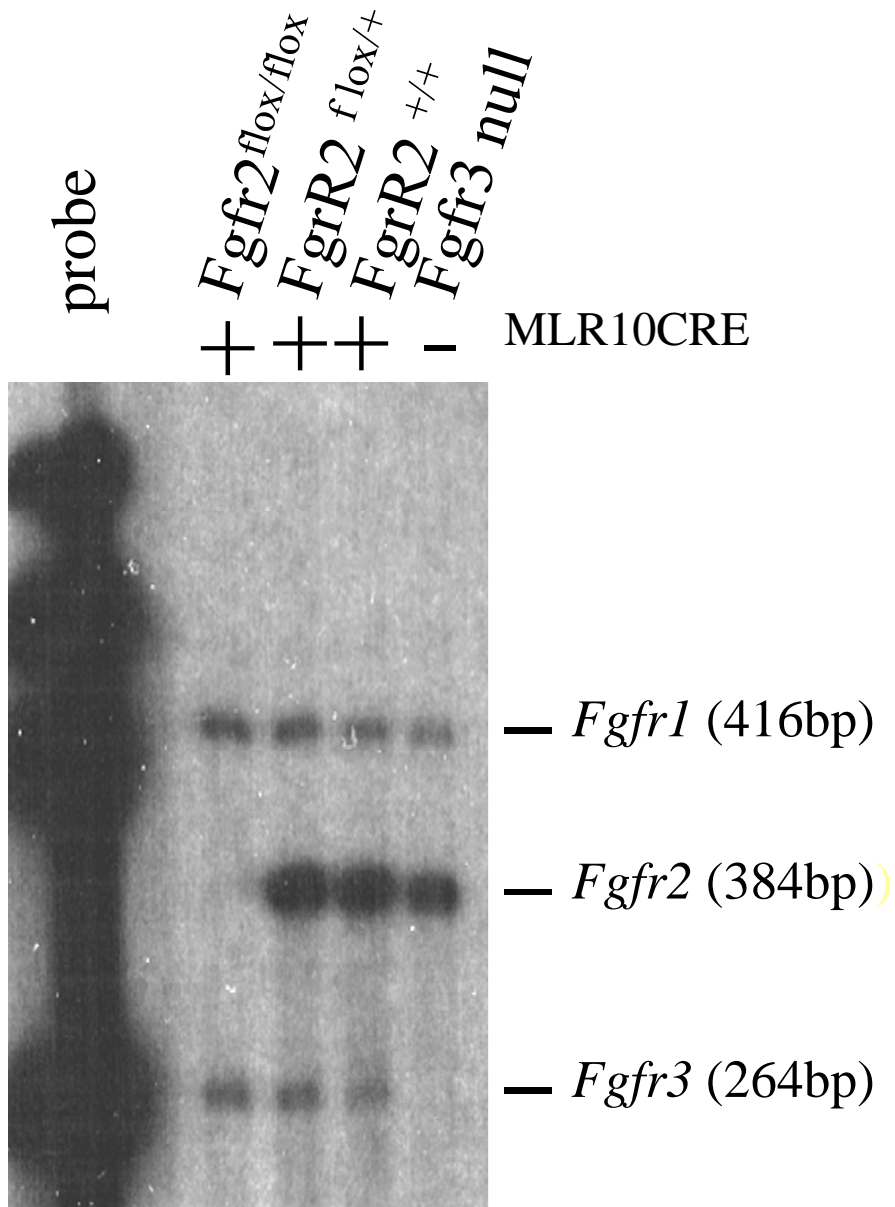

Zhao et al \_ Sup. Fig 2

Supplement: NIHMS52425-supplement-11.pdf [file NIHMS52425-supplement-11.pdf]
